# Supplementary material
Source: PubMed Central journal article supplement (PMC4031562)

## Supplementary Material:

### **An internally potentiated, thermostable, pH sensitive Cys loop receptor from the hydrothermal vent worm *Alvinella pompejana***

By Puneet Juneja, Reinhold Horlacher, Daniel Bertrand, Ryoko Krause, Fabrice Marger and Wolfram Welte

#### **Supplementary Figure 1A**

Multiple sequence alignment for Alv-a1-pHCl, its mutants and Alv-a9 with other members of the Cysteine loop receptor family. GI accession numbers of sequences are as follows, *C. elegans* GluCl  $\alpha$ , 559559 (CE\_GluC\_alpha); Human glycine  $\alpha$ 1, 119372310 (HS\_GlyR\_alpha1), Human GABA  $\rho$ 1, 194097386 (HS\_GABARho1) Human GABAA  $\alpha$ 1, 38327554 (HS\_GABA\_A\_alpha1) Human  $\alpha$ 7 nAChR, 496607 (HS\_Nic\_alpha7) subunits from *T. marmorata* :  $\alpha$ , 213216 (HS\_Nic\_alpha),  $\beta$ , 39653645 (HS\_Nic\_beta),  $\delta$ , 39653649 (HS\_Nic\_delta),  $\gamma$ , 39653647 (HS\_Nic\_gamma), *L. stagnalis* AChBP, 14285341 (LS\_AChBP) *A. californica* AChBP, 325296909 (AC\_AChBP), Human 5-HT3A, 37514834 (HS\_5HT3A) and the bacterial GLIC and ELIC receptors (37523766 and 169791754). Transmembrane helices M1-M4 are indicated as green boxes according to PDB structure 3rhw (*C.elegans* GluCl). The signal peptide for Alv-a1-pHCl and its mutants is indicated by a grey bar. Conserved residues are marked in yellow. N-terminal residues of Alv-a1-pHCl, predicted to be disordered are highlighted in red and were absent in the construct tAlv-a1-pHCl. In thAlv-a1-pHCl, in addition to these N-terminal residues those of the predicted N-terminal helix, highlighted in grey, were deleted. M3-M4 loop residues are highlighted in cyan. In the tAlv-a1-pHCl-AGT and thAlv-a1-pHCl-AGT constructs the predicted M3-M4 loop residues were replaced by the tripeptide AGT.

For an overview of the constructs see Fig. 1 of the main text.

#### **Supplementary Figure 1B**

Sequence alignment for M2 transmembrane helices

Alignments of several anion specific CLRs (A) and cation specific CLRs (B).

The conservation pattern clearly groups Alv-a1-pHCl as an anionic channel and Alv-a9 as a cationic channel, in accord with other authors and our results.

#### **Supplementary Figure 2**

Alignment of EST sequences of Alv-a1-pHCl, EST sequences GO149973.1, GO164508.1, GO215979.1, GO215980.1 were taken from NCBI database and TERA02171 was taken from *Alvinella pomejana* EST sequences database available at [www.alvinella.igbmc.fr](http://www.alvinella.igbmc.fr).

#### **Supplementary Figure 3**

Western Blot with Anti His-tag Antibody of membranes preparations from Sf9 cells for different Alv-a1-pHCL constructs: Lane 1- thAlv-a1-pHCl, Lane 2- thAlv-a1-pHCl-AGT, Lane 3- tAlv-a1-pHCl, and Lane 4- tAlv-a1-pHCl-AGT.

Lanes C: Molecular weight markers from top to bottom (kDa): 170, 130, 100, 70(red), 55, 40, 35, 25 and 15.

#### **Supplementary Figure 4**

Statistics of channel activities of tAlv-a1-pHCl in 8 different oocytes and of Alv-a1-pHCl in 7 different oocytes.

### Supplementary Figure 1

| Signal Peptide   |                                                                                                    |
|------------------|----------------------------------------------------------------------------------------------------|
| Alv-a1-pHCl      | -----IASVKMLLYA-ICLILVLQVLVPTSGT-----EVTDATSPDQDSGTYSVTTTIVYVQGRADITATPNTSVN-----                  |
| tAlv-a1-pHCl     | -----MWGFAGGRLFGIFSAFVPLVAVVCC-----A                                                               |
| tAlv-a1-pHCl-AGT | -----MWGFAGGRLFGIFSAFVPLVAVVCC-----A                                                               |
| Alv-a9           | -----MK---MAELAVVAACILLILLAGD---YSA-----G                                                          |
| CE_GluC_alpha    | -----MA-----TWIVGKLI IASLILGIAQQAQRTKSDIFEDDNDN-----GTTTLESRLARTSPI                                |
| HS_GlyR_alpha1   | -----MYSFNTLRLLYLWETIVFFSLAASKEAEA-----A                                                           |
| HS_GABArhol      | -----MLAVPNMRFGIPLLWGWVLTESRMHWPGRVHEMSKGRPQR-----QRREVHEDAHKQVSPIL                                |
| HS_GABA_A_alpha1 | -----MRKSPGLSDCLWAWILLSTLGRSYGQP-----S                                                             |
| HS_Nic_alpha7    | -----MR---CSPGGVWLGLAASL-----                                                                      |
| TM_Nic_alpha     | -----MI---LCSYWHVGLVLLFSC-----                                                                     |
| TM_Nic_beta      | -----MEDVRRMALGLVMMALALS-----                                                                      |
| TM_Nic_delta     | -----MG-----NIHFVYLLISCLY-----                                                                     |
| TM_Nic_gamma     | -----MV-----LTLLLIICLALE-----                                                                      |
| LS_AchBP         | -----MR-----RNIFCLAELWIV-----                                                                      |
| AC_AchBP         | -----ML-----VSVYLALLVACV-----                                                                      |
| HS_5HT3A         | -----ML---LWVQQALLALLPTLLAAG-----E                                                                 |
| HS_NIC_alpha9    | -----MN---WSHSCISFCWIFYAASRLR-----                                                                 |
| GLIC             | MFPTGWPRKLSIESIAASRML---WQPMAAVAVVQIGLL-----                                                       |
| ELIC             | -----                                                                                              |
| 3rhw_chainA_p001 | -----                                                                                              |
| Alv-a1-pHCl      | SNOEAYSTDFDQRSFLERLL---MDMD---PTVRPVS---GQNDGPVEVKVDFHVLSISAMSEANMEYQLDIYFRQWTDRRLAYNLS---DLGP     |
| tAlv-a1-pHCl     | SNOEAYSTDFDQRSFLERLL---MDMD---PTVRPVS---GQNDGPVEVKVDFHVLSISAMSEANMEYQLDIYFRQWTDRRLAYNLS---DLGP     |
| tAlv-a1-pHCl-AGT | SNOEAYSTDFDQRSFLERLL---MDMD---PTVRPVS---GQNDGPVEVKVDFHVLSISAMSEANMEYQLDIYFRQWTDRRLAYNLS---DLGP     |
| Alv-a9           | VLGFQDRSMSRELGLYEHIV---GNDTRLRFRIRPAR---NANESVHVEISIALIGLEDDLDEKRQVMTSHIWLQRWKNPVVSWSPD---DFGG     |
| CE_GluC_alpha    | HPIEQPQTSKSLAHFLT---SGYD---FRVREPPT---DNGGPPVVSVNMLLRTISKIDVVMNEYSAQLTLRESWIDKRLSYGVK---GDGQ       |
| HS_GlyR_alpha1   | RSAPKP---MSPSDFLDKLMGRTSGYD---ARIRPNF---KGPVNVNVCNIFINSFGSIAETMTDYRVNIFLRQQWINDPRLAYNEY---PDD      |
| HS_GABArhol      | RRSPDITKSPLTKSEQLLRI---DDHD---FSMRPFG---GGPAIPVGDVQVESLDSISEVDMDFMTMLYLRHYWDERLSFPST---NNLS        |
| HS_GABA_A_alpha1 | LQDELKDNITVFFTRILDRLL---DGYD---NLRPLGL---GERVTEVKTDIFVTSFGPVSDDHMEYTIIDVFFRQSWKDERLKFKGP---MTV     |
| HS_Nic_alpha7    | --LHVSLQGEFQRKLYKELV---KNYN---PLERPVA---NDSQPLTVYFSLSLQIMDVDEKNQVLTNNIWLQMSWTDHYLQWNVV---EYPG      |
| TM_Nic_alpha     | ---CGLVLSSEHETRLVANLL---ENYN---KVIREFVE---HHTHFVDITVGLQLIQLINVDVNVQIVETNVRLLRQQWIDVRLRWNPV---DYGG  |
| TM_Nic_beta      | ---GVGASVMEDTLLSVLF---ENYN---PKVRPSQ---TVGDKVTVRVGLTLLSLLILNEKNEEMTSVFLNLAWTDYRLQWDPV---AYEG       |
| TM_Nic_delta     | ---YSGCSGVNEEERLINDLLI-VNKYN---KHVREFV---HNNEVVNIALSLTSLNLSLKETDETTLTNNVMDHAWYDHRLLTWNAS---EYSD    |
| TM_Nic_gamma     | -----VRSNEERLIEKLL---GDYD---KRIKPAK---TLDHVIDVTLKLTNLISLNEKEEALTTNWVIEIQWINDYRLSWNTS---EYEG        |
| LS_AchBP         | -----QACLSLDRADIL---YNIY---QTSRPFVPTQDRDRPVAVSVSLKFINILEVNEITNEVDVVFVQQTWSDRSLAWNSS---HSPD         |
| AC_AchBP         | -----GQAHSQANLMRLKSDLF---NRSP---MYPGP---TKDDPLTVLGTFTLQDITVADKSSNEVDLVVYEQQRWKLSLMMDDPN---EYGN     |
| HS_5HT3A         | ARRSRNTRPALLRLSDYLL---TNYR---KGVREFVR---DWRKPTTVSIDVIVYAILNVDEKNQVLTYYIWRVQYWTDFELQWNPV---DFDN     |
| HS_NIC_alpha9    | ---AAETADGKYAQKLFNDLF---EDYS---NALREFVE---DTDKVLNVTLQITLSQLKMDERNQILITAYLWIRQIWHADYLTDWRD---QYDQ   |
| GLIC             | -----WFSPPV---WGQD---MVSPPP---IADEPLTWTGIYLECYSLDDKAEFTKVNALFSLSKWRDRLAFDPV---RSG                  |
| ELIC             | -----APADNAA---DARPVDVSVSIFINKIYGVNTLQTYKVDGYVAQWTGKPKRTPGDKPLIVEN                                 |
| 3rhw_chainA_p001 | -----SDSKILAHFLT---SGYD---FRVREPPT---DNGGPPVVSVNMLLRTISKIDVVMNEYSAQLTLRESWIDKRLSYGVK---GDGQ        |
| Cys-Loop         |                                                                                                    |
| Alv-a1-pHCl      | GSRMGYFKLGKDPNRLIWPDLFFPFKQASFHVITVFNIMVQIYPSGEVMYSTRLLTVIACKMQLSSFPMDSQTCPPFDIESYSYQTSSEMILL      |
| tAlv-a1-pHCl     | GSRMGYFKLGKDPNRLIWPDLFFPFKQASFHVITVFNIMVQIYPSGEVMYSTRLLTVIACKMQLSSFPMDSQTCPPFDIESYSYQTSSEMILL      |
| tAlv-a1-pHCl-AGT | GSRMGYFKLGKDPNRLIWPDLFFPFKQASFHVITVFNIMVQIYPSGEVMYSTRLLTVIACKMQLSSFPMDSQTCPPFDIESYSYQTSSEMILL      |
| Alv-a9           | L-----RDVMI PADEVVTPTDITAHNSLSTSYHED---HTSQLVVHSDGLIIVWAVQSRLETFCPLDLITYFPDLTHNCP IIVGWSYSDSSKLNLS |
| CE_GluC_alpha    | P-----DFVILTUGHQI WMPDFFPFNEKQAYKHTIDKPNVLRIRIHNDGTVLYSVRISLVLSCPMYQLQYYPMDVQCQCSIDLASYATTKDIEYL   |
| HS_GlyR_alpha1   | L-----DLDPMSLDSIWKPDFFANKEGAFHEITTDNKLRLSRNGVLYSIRITLTLACPMDLKNFMDVQTCIMQLPESFGYTMNDLIFE           |
| HS_GABArhol      | M-----TFDGRVLVKI WVPDFFVHSKRSFV IHDTTDNNVLRVQPDGKVLVSLRVTVTAMCNDMDFSRFFLDQTCSLEIESAYATTEDDLMLY     |
| HS_GABA_A_alpha1 | L-----RLNNLMASKI WTPDFFHNGKKSVAHNMTMPNKLRLITEDGTLITYMRLTVRAECPMHLEDFPMDAHA CPLKFGSYAYTRAEVVE       |
| HS_Nic_alpha7    | V-----KTVRFPDGGI WKPDLILLYNSADERRFAT---FHTNVLVNNSGHCQYLPPIGFSYCYIDVRWF PFDVQHCKLKFPGSWSYDGLD       |
| TM_Nic_alpha     | I-----KKIRLPSDDV WLPDLVLYNNAEDGFAIV---HMTKLLLDVYTKIMWTPPAIFKSYCEIIVTHFPDQWNCMTKLGITYDGTKVSIS       |
| TM_Nic_beta      | I-----KDLISPSDDV WQPDIVLMMNNDGSPFEIT---LHVNVLVQHTGAVSWHPSALYRSCCTIKVMYFPFDWQNCNTMVKFSYTYDSEVILQ    |
| TM_Nic_delta     | I-----SILRLRPELWIPDIFVLQNNNDGQYNVA---YFCNVLVRPNGYVTWLPALFRSSCPINLVNVPFDWQNCSLKFTALYNANESLMD        |
| TM_Nic_gamma     | I-----DLVRIPSELL WLPDVLENNVDGQFEVA---YYANVLVYNDGSMYWLPPAIYRSTCP IAVTYFPFDWQNCNSLFRSQTYNAHEVNLO     |
| LS_AchBP         | Q-----VSPV ISSLWVPLAAYNAISKPEVL---TPQLARVSDGCEVLYMPSIRQRFSCDVSGVDTE---SGATORIKIGSWTHHSREISVD       |
| AC_AchBP         | I-----TDFRTSAADI WPTDITAYSSTRPVQVL---SPQIAVVTHDGSMVIPAQRSLFPMCDPT---GVDBEGATCAVKFGSWSYSGFEDLK      |
| HS_5HT3A         | I-----TKLSIPTDSI WVPDILINEFVWGVKSP---NIPYVYIRHQGEVQNYKPLQVVTACSLDIYNF PFDVQNCSLTFSWLTITQDINIS      |
| HS_NIC_alpha9    | L-----DSIRIPSDLV WRPDIVLYNKADDESSEP---VNTNVLVRYDGLITWDAPAITKSSCVVDVTVYFPFDNQQNLTFGSWRTYNGNQVIF     |
| GLIC             | V-----RVKTYEPEAL WIPERFVNVVENARDA---DVVDISVSDPCTQOYLERFARVLSPLDFRRYFPDSDQLTHLIEVLRVSDVNIPLVLA      |
| ELIC             | T-----QIERWINNGL WVPALF I INVVGSPDT---GNKRLMLFPDGRVINYARFLGFSFNMDFRFLFPDQQVFLVLELPPFSYNNQRLRS      |
| 3rhw_chainA_p001 | P-----DFVILTUGHQI WMPDFFPFNEKQAYKHTIDKPNVLRIRIHNDGTVLYSVRISLVLSCPMYQLQYYPMDVQCQCSIDLASYATTKDIEYL   |
| M1               |                                                                                                    |
| Alv-a1-pHCl      | WKDNP-----VTLEDFFELPRFSLKLP IKTTVCTKEYKT-----GSFPCLQAKFEMSRFFGDYLLQTYIP SGLIVILSWAFWI              |
| tAlv-a1-pHCl     | WKDNP-----VTLEDFFELPRFSLKLP IKTTVCTKEYKT-----GSFPCLQAKFEMSRFFGDYLLQTYIP SGLIVILSWAFWI              |
| tAlv-a1-pHCl-AGT | WKDNP-----VTLEDFFELPRFSLKLP IKTTVCTKEYKT-----GSFPCLQAKFEMSRFFGDYLLQTYIP SGLIVILSWAFWI              |
| Alv-a9           | HWGDPELD-----LRHGSALDNSEWVIGNSVVLHSMKMRGVGT---QPYQDITVYVTL SRHAYVYQLVYVAVVTVFLVTPAVF IIL           |
| CE_GluC_alpha    | WKEHSPLQ-----LKVGLSSSLPSFQLTNTSTTYCTSVNT-----GIYSCLRRTTIQLRKEFSFYLLQYIIP SCLMVLVSVWSFWF            |
| HS_GlyR_alpha1   | WQEQGA-----VQVADGLTLQPFILKEEKDLRYCTKHYNT-----GKFTCEIARFHLERQMGYLLQYIIP SLLIVILSWISFWI              |
| HS_GABArhol      | WKKGNDS-----LKTDERISLSQFLIQEFHTTTLKAFYSST-----GWCNRLYINFTLRRHIFFFLLQTYTFPMTLMWLSWSFWI              |
| HS_GABA_A_alpha1 | WTREPARS-----VVVAEDGSRNLNQYDLGQTVDSGIVQSST-----GEYVVMTHPHLKRKIGYFVIOQTYLPCIMTVILSQVSWFL            |
| HS_Nic_alpha7    | MQE-----ADISGYIPNGEWDLVGIPGRKSERFYECC-----EPYPDVTFTVMTRRTLLYGLNLLIP CVLISALALLVFL                  |
| TM_Nic_alpha     | PESDR-----PDLSTFMGESWEMVMDYGRWKHWVYTCPPD-----TPYLDITYHFIIMOR IPLYFVVNVNII PCLLFSFLLTVRVLVY         |
| TM_Nic_beta      | HALDAKGERE---VKEIMINQDAPFTENGQWIEHKSPRKNWRSDD---PSYEDVTFYLI IQRKPLFYIYVITVPCILISIALILVFLV          |
| TM_Nic_delta     | LMTDITDGKDYPIEWI I IDPEAFTENGQWIEHKSPRKNWRSDD---TNYQDVTYFLLI IRRKPLFYIYVITVPCILISIALILVFLV         |
| TM_Nic_gamma     | LSAEEGEVV---EWIHI DPEDPTENGQWIRHRPAKKNYNWQLTKDD---IDFQEIIFFLI IQRKPLFYIINI IAPCVLISLVLVYVFL        |
| LS_AchBP         | PTTNS-----DDSEYFSQYSRFEILDVTQKNSVTVYSCCP-----EAYEDVEVSLNFRKGRSEIL-----                             |
| AC_AchBP         | TDTDQ-----VDLSSYIYASSKEYELSATQTRQVQHYSCCP-----EPYIDVNLVVKFRERRRAGNGFFRNLPD-----                    |
| HS_5HT3A         | LWRLPEK-----VKSDRSVPMNQGWEVLLGVLPYFRFESSMSS---NYAEMKFYVIRRRPLFYVYVLLLPSIFLVMVDIVGFYL               |
| HS_NIC_alpha9    | NALDS-----GDLSDFI EDVWEVLLGMPAVKNNVSYGCCS-----EPYDVTFTLLYLRSSFYVIVNLLIP CVLISFLAPLSFYL             |
| GLIC             | VDLK-----VGKNDVFDIEMWIESTAVVKPANFALED---RLESKLDYQRLRSQYFSYIPI NILPLGLFILISWTAFAWS                  |
| ELIC             | DIQVY-----TENIDNEEIDGDWRKRASHTSIDIRYDHLSSVQPNQNEFSRITVRIDAVRNPSYLLVPLGLLIIAASVSWFVW                |
| 3rhw_chainA_p001 | WKEHSPLQ-----LKVGLSSSLPSFQLTNTSTTYCTSVNT-----GIYSCLRRTTIQLRKEFSFYLLQYIIP SCLMVLVSVWSFWF            |

M2

M3

Alv-a1-pHCl
tAlv-a1-pHCl
tAlv-a1-pHCl-AGT
Alv-a9
CE\_GluC\_alpha
HS\_GlyR\_alpha1
HS\_GABArhol
HS\_GABA\_A\_alpha1
HS\_Nic\_alpha7
TM\_Nic\_alpha
TM\_Nic\_beta
TM\_Nic\_delta
TM\_Nic\_gamma
LS\_AchBP
AC\_AchBP
HS\_5HT3A
HS\_NIC\_alpha9
GLIC
ELIC
3rhw\_chainA\_p001

NKEAIPARVSLSIIVTVM...
NKEAIPARVSLSIIVTVM...
NKEAIPARVSLSIIVTVM...
PAES-AHKFV...
DRTAIPARVTLGVT...
NMDAAPARVGLGIT...
DRRAVPARVPLGIT...
NRESVPARTVFGVT...
PADS-GEKISL...
PTDS-GEKMTLS...
PPDA-GEKMSLS...
PAES-GEKMSTA...
PAQAGGQKCTLS...
PPNS-GERVSFK...
PAAS-GEKVLG...
TSY-EANVTLV...
ESF-SERLQTS...
DRTAIPARVTLGVT...

Alv-a1-pHCl
tAlv-a1-pHCl
tAlv-a1-pHCl-AGT
Alv-a9
CE\_GluC\_alpha
HS\_GlyR\_alpha1
HS\_GABArhol
HS\_GABA\_A\_alpha1
HS\_Nic\_alpha7
TM\_Nic\_alpha
TM\_Nic\_beta
TM\_Nic\_delta
TM\_Nic\_gamma
LS\_AchBP
AC\_AchBP
HS\_5HT3A
HS\_NIC\_alpha9
GLIC
ELIC
3rhw\_chainA\_p001

AGQPASKVAGAE
AGQPASKVAGAE
RVLCCLFYEDFLC...
-----NLHNDV...
-----EGRFNF...
-----PRTAML...
-----NTYA...
WFLRMKRPGEDK...
NLMFFSTMKRAS...
PFLWIQRFPVT...
RIHLMRVRVDE...
KYLGMHLEPSE...
WLLCLREQSTSQ...
RVLFVYDVGESC...

M4

Alv-a1-pHCl
tAlv-a1-pHCl
tAlv-a1-pHCl-AGT
Alv-a9
CE\_GluC\_alpha
HS\_GlyR\_alpha1
HS\_GABArhol
HS\_GABA\_A\_alpha1
HS\_Nic\_alpha7
TM\_Nic\_alpha
TM\_Nic\_beta
TM\_Nic\_delta
TM\_Nic\_gamma
LS\_AchBP
AC\_AchBP
HS\_5HT3A
HS\_NIC\_alpha9
GLIC
ELIC
3rhw\_chainA\_p001

DCODEP
DCODEP
P
LDDAKMIREYNS...
LNLETKT
KSPPEMRK
ERSSPQRKSQR...
ETKPPPEK
PDLAKILLEEV...
PDKSAIEGVKY...
QDLKEAVEA...
DEIKSGIDSTN...
PEIKSCVEACN...
LAVCGLLQELSS...
AQYKVLTRNIE...
ASITRASRIA...
LLIQ-RCRLA...
AGTT- EWNDISK...

Supplementary Figure 1B

A)

|                  | -1'   | 2'     | 9'     |
|------------------|-------|--------|--------|
| Alv-a1-pHCl      | NKEAI | PARVSL | SIVTVM |
| CE_GluC_alpha    | DRTAI | PARVTL | LGVTTL |
| HS_GlyR_alpha1   | NMDAA | PARVGL | GITTVL |
| HS_GABArho1      | DRRAV | PARVPL | GITTVL |
| HS_GABA_A_alpha1 | NRESV | PARTVF | GVTTVL |

B)

|               |       |        |        |        |         |        |
|---------------|-------|--------|--------|--------|---------|--------|
| Alv-a9        | PAES- | AHKFVL | GSGLLI | SEVLLM | ISLNDI  | IPAAHH |
| HS_Nic_alpha7 | PADS- | GEKISL | GITVLL | SLTVFM | LLVAEIM | PATSD  |
| HS_5HT3A      | PPNS- | GERVSF | KITLLL | GYSVFL | IIVSDTL | PATAI  |
| HS_NIC_alpha9 | PAAS- | GEKVSL | GVTILL | AMTVFQ | LMVAEIM | PASEN  |

Supplementary Figure 2

TERA02171 ATGTGTACCCTCAGTGGATGGCGGCCGCCGGTCTATTTTAAAGACACCGACCTTCATCTC  
GO149973 -----  
GO164508 -----  
GO215979 -----  
GO215980 -----

TERA02171 AAAGGAACGCCTTGTTTTAACCCGGTTCATTTTAAAGGTAACAACTTTTCCGTCGGCTC  
GO149973 -----  
GO164508 -----  
GO215979 -----  
GO215980 -----

TERA02171 GCGGCCAGGTGAGACAATTCTTTGTGGGCTACAGCAGCTAGAAGTTCAGGTAAACATCGT  
GO149973 -----  
GO164508 -----  
GO215979 -----  
GO215980 -----

TERA02171 CTTCGACTGAGATCGTCGTGAAGTCTAGGCAGGTCGCTTATCATCAAACGTCGATAGATC  
GO149973 -----  
GO164508 -----  
GO215979 -----  
GO215980 -----

TERA02171 GACATTCTGACAATAAATCGCGTCAGTCAAGATGCTTCTGTACGCCATTTGCCTTATCCT  
GO149973 -----  
GO164508 -----  
GO215979 -----  
GO215980 -----

TERA02171 CGTGCTGCAGTTGGTGCCGACCAGCGGCACAGAGGTCACGGACGCCACGTCTCCGGATCA  
GO149973 -----  
GO164508 -----  
GO215979 -----  
GO215980 -----

TERA02171 AGATTCTGGAACATACTCGGTCAACCAGACAACATACGTAGGTCAGAGAGCAGACACCAC  
GO149973 -----  
GO164508 -----  
GO215979 -----  
GO215980 -----

TERA02171 GGCCACACCGAATACAAGCGTAAACGTGTCAAACCAGGAGCGTATAGCACCGACTTTGA  
GO149973 -----  
GO164508 -----  
GO215979 -----  
GO215980 -----

TERA02171 CCAACGATCGTTTCTTGAGCGTCTGCTTATGGATATGGATCCGACGGTGCACCGGTCAG  
GO149973 -----  
GO164508 -----  
GO215979 -----  
GO215980 -----

TERA02171 TGGTCAGAACGACGGACCGGTTGAGGTTAAAGTAGATTTCCATGTTCTCAGCATAAGCGC  
GO149973 --GTCAGAACGACGGACCGGTTGAGGTTAAAGTAGATTTCCATGTTCTCAGCATAAGCGC  
GO164508 -----  
GO215979 -----  
GO215980 -----

TERA02171 AATGAGCGAAGCTAATATGGAATATCAGCTGGACATCTACTTTCGACAGACATGGACAGA  
GO149973 AATGAGCGAAGCTAATATGGAATATCAGCTGGACATCTACTTTCGACAGACATGGACAGA  
GO164508 -----  
GO215979 -----  
GO215980 -----

TERA02171 TCGCCGGCTGGCATAACAACCTCTCCGATCTGGGTCCCGGTTCCAGGATGGGTTACTTTAA  
GO149973 TCGCCGGCTGGCATAACAACCTCTCCGATCTGGGTCCCGGTTCCAGGATGGGTTACTTTAA  
GO164508 -----  
GO215979 -----  
GO215980 -----

TERA02171 ACTGGGCAAGGATCCGAGAAATCTAATCTGGGTACCAGATCTTTTCTTTCCGTTTCGAGAA  
GO149973 ACTGGGCAAGGATCCGAGAAATCTAATCTGGGTACCAGATCTTTTCTTTCCGTTTCGAGAA  
GO164508 -----  
GO215979 -----  
GO215980 -----

TERA02171 GCAGGCCTCTTTCCATGTCATTACCCTGCGCAAACATCATGGTCCAGATTTATCCGAGCGG  
GO149973 GCAGGCCTCTTTCCATGTCATTACCCTGCGCAAACATCATGGTCCAGATTTATCCGAGCGG  
GO164508 -CAGGCCTCTTTCCATGTCATTACCCTGCGCAAACATCATGGTCCAGATTTATCCGAGCGG  
GO215979 -CAGGCCTCTTTCCATGTCATTACCCTGCGCAAACATCATGGTCCAGATTTATCCGAGCGG  
GO215980 -----

TERA02171 AGAGGTCATGTACAGCACCAGGTTAACCCCTTGTTCATAGCGTGCAAGATGCAGCTTTTCGTC  
GO149973 AGAGGTCATGTACAGCACCAGGTTAACCCCTTGTTCATAGCGTGCAAGATGCAGCTTTTCGTC  
GO164508 AGAGGTCATGTACAGCACCAGGTTAACCCCTTGTTCATAGCGTGCAAGATGCAGCTTTTCGTC  
GO215979 AGAGGTCATGTACAGCACCAGGTTAACCCCTTGTTCATAGCGTGCAAGATGCAGCTTTTCGTC  
GO215980 -----

TERA02171 CTTTCCCATGGACAGCCAGACGTGTCCTTTTGGACATCGAAAGTTACTCCTACCAAACGAG  
GO149973 CTTTCCCATGGACAGCCAGACGTGTCCTTTTGGACATCGAAAGTTACTCCTACCAAACGAG  
GO164508 CTTTCCCATGGACAGCCAGACGTGTCCTTTTGGACATCGAAAGTTACTCCTACCAAACGAG  
GO215979 CTTTCCCATGGACAGCCAGACGTGTCCTTTTGGACATCGAAAGTTACTCCTACCAAACGAG  
GO215980 -----G

TERA02171 TGAGATGATCCTGTTGTGGAAGGACAACCCCGTGACACTTGAGGATTTTTTTGAACTGCC  
GO149973 TGAGATGATCCTGTTGTGGAAGGACAACCCCGTGACACTTGAGGATTTTTTTGAACTGCC  
GO164508 TGAGATGATCCTGTTGTGGAAGGACAACCCCGTGACACTTGAGGATTTTTTTGAACTGCC  
GO215979 TGAGATGATCCTGTTGTGGAAGGACAACCCCGTGACACTTGAGGATTTTTTTGAACTGCC  
GO215980 TGAGATGATCCTG-TGTGGAAGGACAACCCCGTGACACTTGAGGATTTTTTTGAACTGCC

TERA02171 CCGGTTTTCTC-----  
GO149973 CCGGTTTTCTCTGAAGCTCCCATTAAAACGACCGTCTGTACAAAGGAATACAAAACAGG  
GO164508 CCGGTTTTCTCTGAAGCTCCCATTAAAACGACCGTCTGTACAAAGGAATACAAAACAGG  
GO215979 CCGGTTTTCTCTGAAGCTCCCATTAAAACGACCGTCTGTACAAAGGAATACAAAACAGG  
GO215980 CCGGTTTTCTCTGAAGCTCCCATTAAAACGACCGTCTGTACAAAGGAATACAAAACAGG

TERA02171 -----  
GO149973 AAGCTTTCCTTGTCTACAGGCGAAGTTTGAATGAGCCGTTTCTTTGGTGATTACCTGCT  
GO164508 AAGCTTTCCTTGTCTACAGGCGAAGTTTGAATGAGCCGTTTCTTTGGTGATTACCTGCT  
GO215979 AAGCTTTCCTTGTCTACAGGCGAAGTTTGAATGAGCCGTTTCTTTGGTGATTACCTGCT  
GO215980 AAGCTTTCCTTGTCTACAGGCGAAGTTTGAATGAGCCGTTTCTTTGGTGATTACCTGCT

TERA02171 -----  
GO149973 CCAGACGTATATCCCATCCGGATTGATCGTCATCCTCTCCTGGGTGGCATTCTGGATCAA  
GO164508 CCAGACGTATATCCCATCCGGATTGATCGTCATCCTCTCCTGGGTGGCATTCTGGATCAA  
GO215979 CCAGACGTATATCCCATCCGGATTGATCGTCATCCTCTCCTGGGTGGCATTCTGGATCAA  
GO215980 CCAGACGTATATCCCATCCGGATTGATCGTCATCCTCTCCTGGGTGGCATTCTGGATCAA

TERA02171 -----  
GO149973 TAAAGAAGCCATTCGGCTAGGGTTTCGCTTAGCATTGTACCGGTTCATGACTGGTGTC  
GO164508 TAAAGAAGCCATTCGGCTAGGGTTTCGCTTAGCATTGTACCGGTTCATGACTGGTGTC  
GO215979 TAAAGAAGCCATTCGGCTAGGGTTTCGCTTAGCATTGTACCGGTTCATGACTGGTGTC  
GO215980 TAAAGAAGCCATTCGGCTAGGGTTTCGCTTAGCATTGTACCGGTTCATGACTGGTGTC

TERA02171 -----  
GO149973 CCACATGCGCG-----  
GO164508 CCACATGCGCGTTCTAAGACTTCCATTCCCAGTGTCACTTACCTGAAGGCCGTCGATGT  
GO215979 CCACATGCGCGTTCTAAGACTTCCATTCCCAGTGTCACTTACCTGAAGGCCGTCGATGT  
GO215980 CCACATGCGCGTTCTAAGACTTCCATTCCCAGTGTCACTTACCTGAAGGCCGTCGATGT

TERA02171 -----  
GO149973 GTGGATGATGATGGCCATGGTATTTGTGTTTCGCGGGCGGTTCATCGAGTACGCCTTCGTCAA  
GO164508 GTGGATGATGATGGCCATGGTATTTGTGTTTCGCGGGCGGTTCATCGAGTACGCCTTCGTCAA  
GO215979 GTGGATGATGATGGCCATGGTATTTGTGTTTCGCGGGCGGTTCATCGAGTACGCCTTCGTCAA  
GO215980 GTGGATGATGATGGCCATGGTATTTGTGTTTCGCGGGCGGTTCATCGAGTACGCCTTCGTCAA

TERA02171 -----  
GO149973 CTCTCTCGATCGTAAGGCGATGAAAGCAAAAAGGCCGGACAACCAGCCAGCAAGGTGGC  
GO164508 CTCTCTCGATCGTAAGGCGATGAAAGCAAAAAGGCCGGACAACCAGCCAGCAAGGTGGC  
GO215979 CTCTCTCGATCGTAAGGCGATGAAAGCAAAAAGGCCGGACAACCAGCCAGCAAGGTGGC  
GO215980 CTCTCTCGATCGTAAGGCGATGAAAGCAAAAAGGCCGGACAACCAGCCAGCAAGGTGGC

TERA02171 -----  
GO149973 -----  
GO164508 CGGCGCGGAAGACGGCCAGGATGAGCCCAAGTACGCAGACCACGCCTAGAGAGTTGACAA  
GO215979 CGGCGCGGAAGACGGCCAGGATGAGCCCAAGTACGCAGACCAC-----  
GO215980 CGGCGCGGAAGACGGCCAGGATGAGCCCAAGTACGCAGACCACGCCAAGAGAGTTGACAA

TERA02171 -----  
GO149973 -----  
GO164508 AGTCAGCAGAATCGTCTTTCCTTTGGCCTTTGTACTCTTNCACGCCGTCTACTGGCC---  
GO215979 -----  
GO215980 AGTCAGCAGAATCGTCTTTCCTTTGGCCTTTGTACTCTTCAACGCCGTCTACTGGCCATA

TERA02171 -----  
GO149973 -----  
GO164508 -----  
GO215979 -----  
GO215980 CTACACACGATCTATTCCGTCCGAGTAAGAAGAACGCACATCACCTGACAAGGGTTGCT

TERA02171 -----  
GO149973 -----  
GO164508 -----  
GO215979 -----  
GO215980 GGCTGTTTTATATTTATTCACCTTCTTTGTTAGCACGCAGTTTATTAAATGATTACCATA

TERA02171 -----  
GO149973 -----  
GO164508 -----  
GO215979 -----  
GO215980 TCTAATGTCACAGGCCATATTTTCGATTCTTTCCAATAAATATTATAGGAGTTTACCCT

TERA02171 -----  
GO149973 -----  
GO164508 -----  
GO215979 -----  
GO215980 CAAAAAAA

Supplementary Figure 3

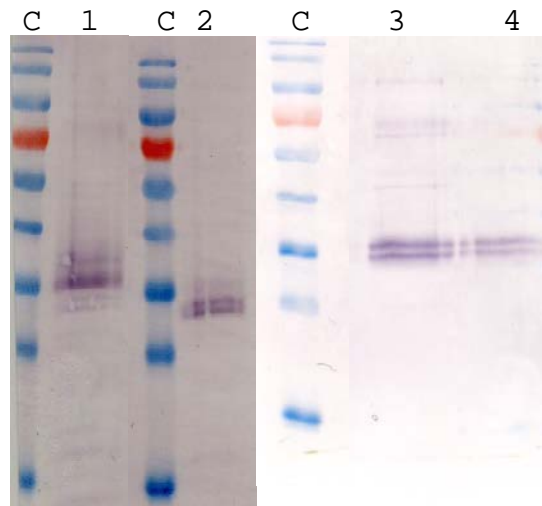

Supplementary Figure 4

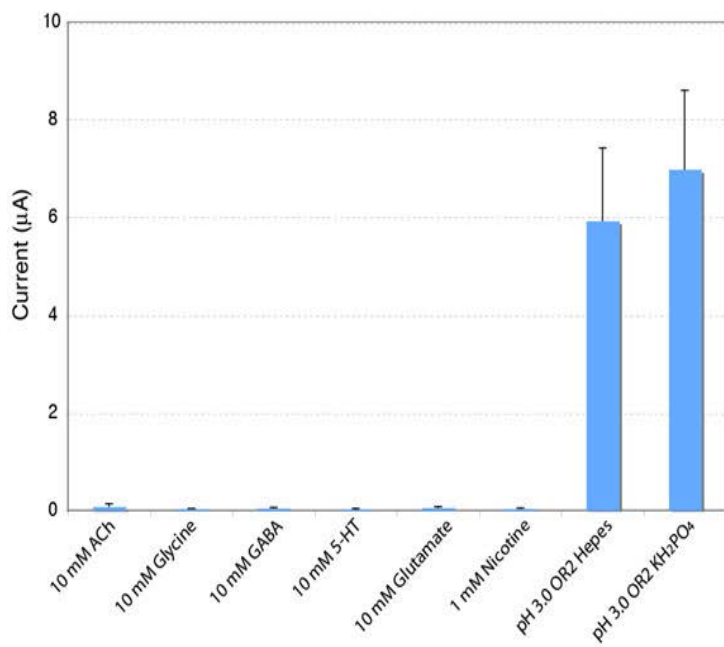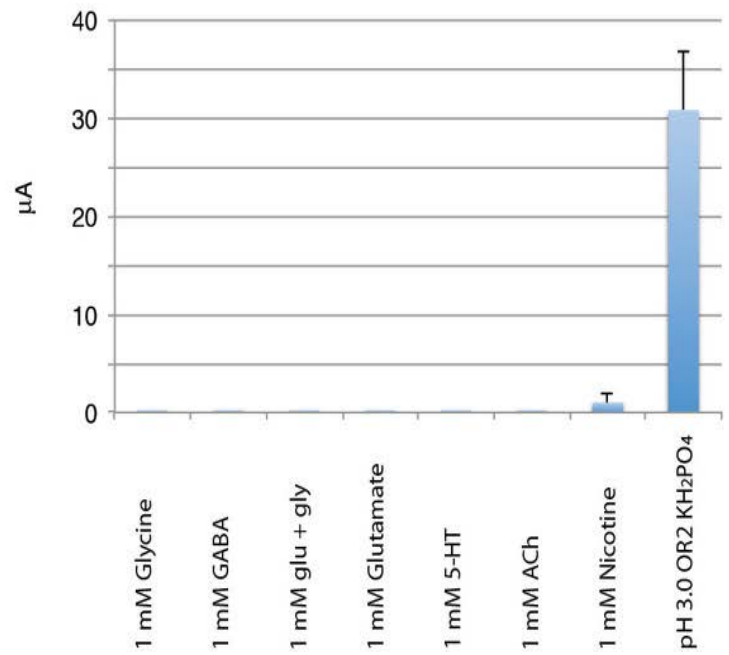

Supplement: supp_M113.525576_jbc.M113.525576-1.pdf [file supp_M113.525576_jbc.M113.525576-1.pdf]
